# Supplementary material
Source: MDPI journal article supplement (https://www.mdpi.com/2073-4344/12/7/799)
Supplement: s1 [file s1]

## Supplementary Materials

# Sn(IV) Porphyrin-Based Ionic Self-Assembled Nanostructures and Their Application in Visible Light Photo-Degradation of Malachite Green

Nirmal Kumar Shee and Hee-Joon Kim\*

*Department of Chemistry and Bioscience, Kumoh National Institute of Technology  
61 Daehak-ro, Gumi 39177, Republic of Korea*

### List of contents:

**Figure S1.**  $^1\text{H}$  NMR spectrum of 5,10,15,20-tetrakis[4-(2-pyridyl)phenyl]porphyrin **1** in  $\text{CDCl}_3$ .

**Figure S2.**  $^1\text{H}$  NMR spectrum of *trans*-dihydroxo[5,10,15,20-tetrakis(4-(2-pyridyl)phenyl)porphyrinato]tin(IV) **2** in  $\text{CDCl}_3$ .

**Figure S3.** ESI-MS spectrum of compound **1**.

**Figure S4.** ESI-MS spectrum of compound **2**.

**Figure S5.** FT-IR spectra of compound **1** and its ionic complexes in KBr.

**Figure S6.** FT-IR spectra of compound **2** and its ionic complexes in KBr.

**Figure S7.** UV-vis spectroscopic observation of the photocatalytic degradation of MG dye in aqueous solution under visible light irradiation by photocatalyst **1** and **2**.

**Figure S8.** Absorption spectral change of MG dye for the photocatalytic degradation by photocatalyst generated from **2** and  $\text{H}_3\text{PO}_4$  in aqueous solution under visible light irradiation.

**Figure S9.** Kinetics for the photocatalytic degradation of MG under visible light irradiation by photocatalyst generated from **1** and various acids.

**Figure S10.** Kinetics for the photocatalytic degradation of MG under visible light irradiation by photocatalyst generated from **2** and various acids.

**Figure S11.** Recyclability of the photocatalyst generated from **2** and  $\text{H}_3\text{PO}_4$  towards the degradation of MG dye.

**Figure S12.** FE-SEM images of photocatalyst generated from **2** and  $\text{H}_3\text{PO}_4$  (after and before the degradation of MG dye).

**Figure S13.** Effect of initial concentration of MG on the degradation by the photocatalyst (5 mg) generated from **2** and  $\text{H}_3\text{PO}_4$ .

**Figure S14.** Effect of temperature on the MG degradation by the photocatalyst generated from **2** and  $\text{H}_3\text{PO}_4$ .

**Figure S15.** Effect of pH of the solution on the MG degradation by the photocatalyst generated from **2** and  $\text{H}_3\text{PO}_4$ .

**Figure S16.** Photocatalytic degradation of MG dye in aqueous solution by the photocatalyst generated from **2** and  $\text{H}_3\text{PO}_4$  with the addition of different scavengers under visible light irradiation ( $[\text{BQ}]_0 = [\text{tBuOH}]_0 = 1 \text{ mM}$ , pH 7, temperature 298 K).

**Figure S17.**  $\text{N}_2$  adsorption-desorption isotherms at 77 K for the photocatalysts derived from **1** and **2** with  $\text{H}_3\text{PO}_4$ .

**Figure S18.** Adsorption of MG dye for the photocatalysts derived from **1** and **2** with  $\text{H}_3\text{PO}_4$ .

**Figure S19.** ESI-MS spectrum (positive ion mode) of the reaction mixture of MG with the photocatalyst generated from **2** and  $\text{H}_3\text{PO}_4$  after 30 min of visible light irradiation.

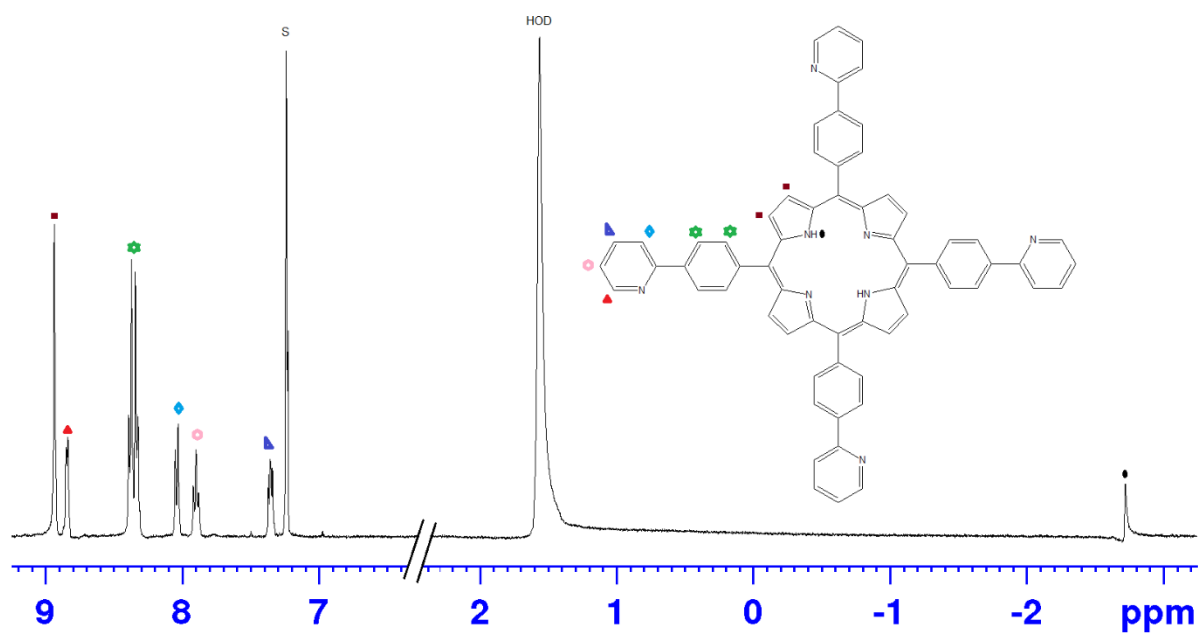

**Figure S1.** <sup>1</sup>H NMR spectrum of 5,10,15,20-tetrakis[4-(2-pyridyl)phenyl]porphyrin **1** in CDCl<sub>3</sub>.

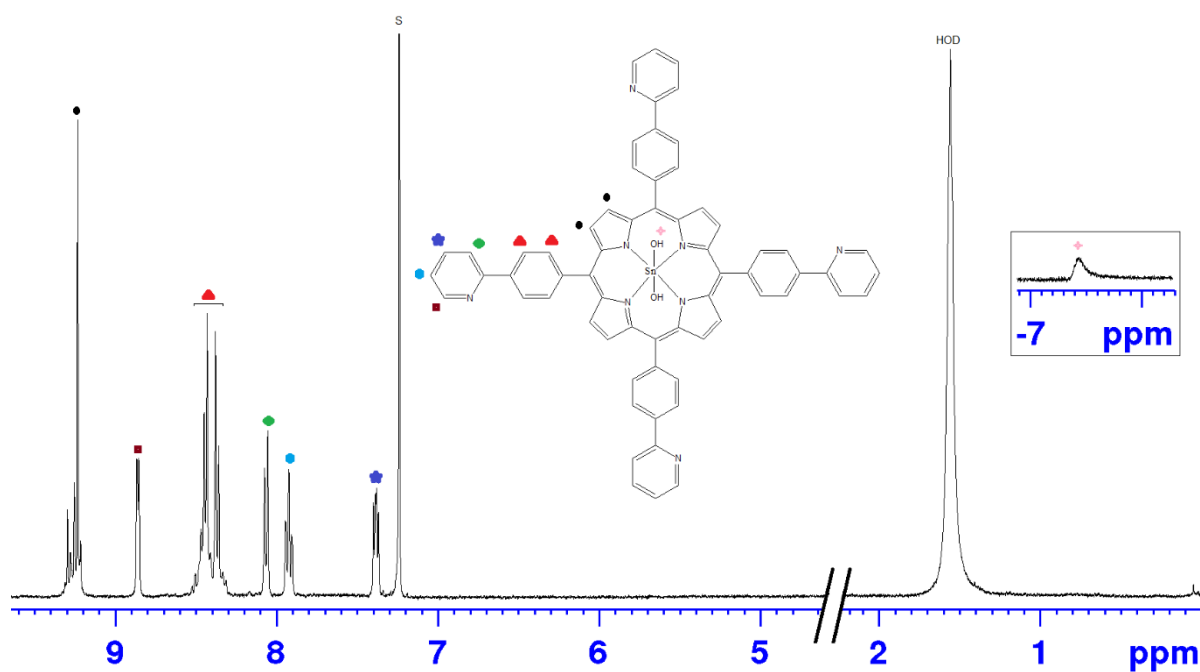

**Figure S2.** <sup>1</sup>H NMR spectrum of *trans*-dihydroxo[5,10,15,20-tetrakis(4-(2-pyridyl)phenyl)porphyrinato]tin(IV) **2** in CDCl<sub>3</sub>.

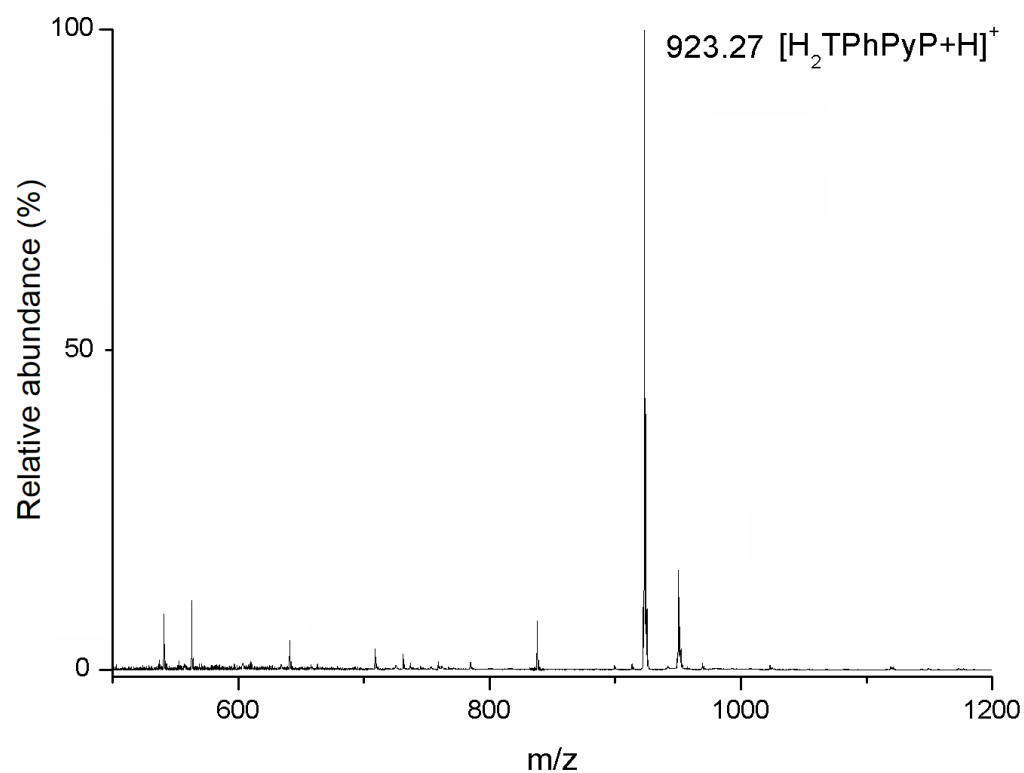

**Figure S3.** ESI-MS spectrum of **1**.

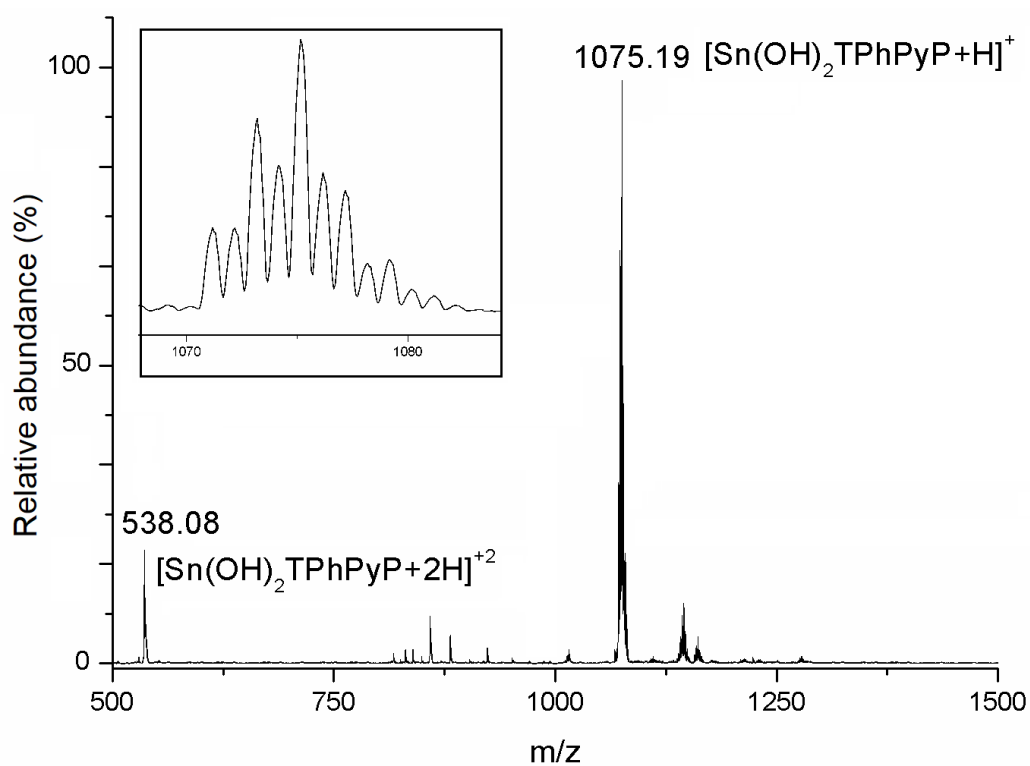

**Figure S4.** ESI-MS spectrum of **2**.

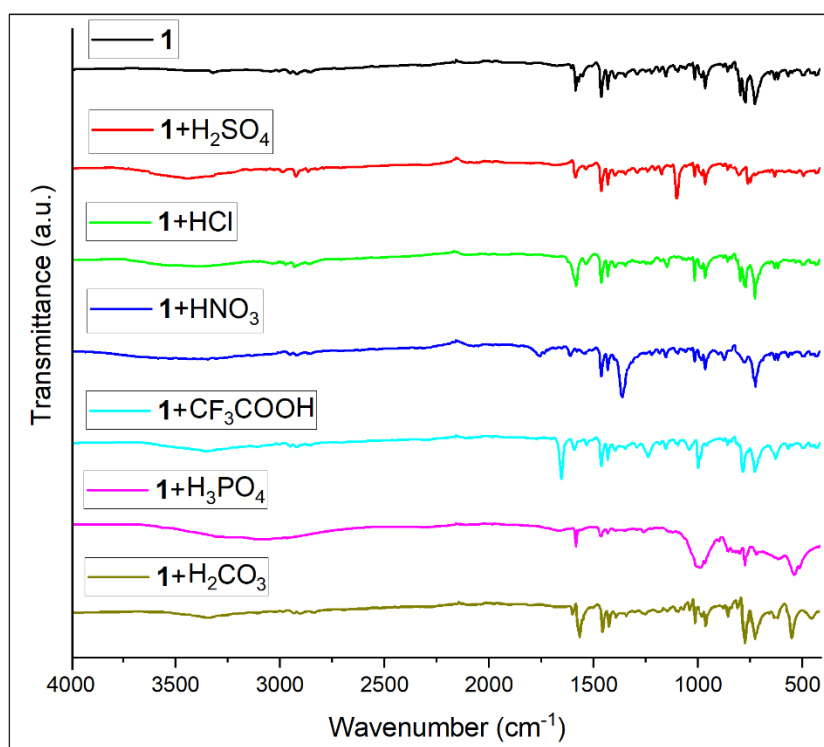

**Figure S5.** FT-IR spectra of **1** and its ionic complexes in KBr.

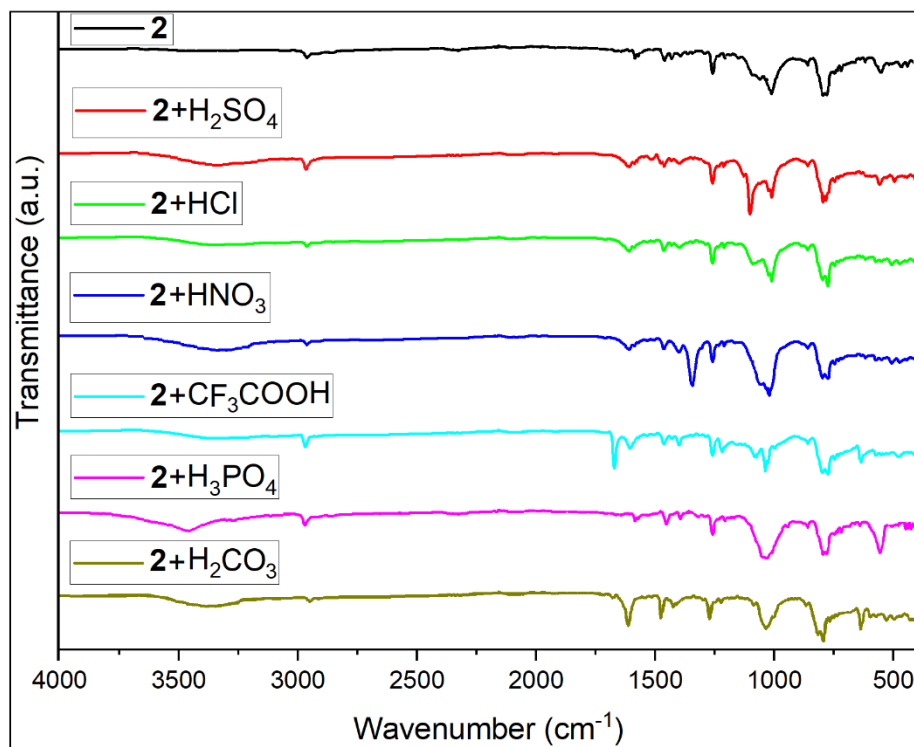

**Figure S6.** FT-IR spectra of **2** and its ionic complexes in KBr.

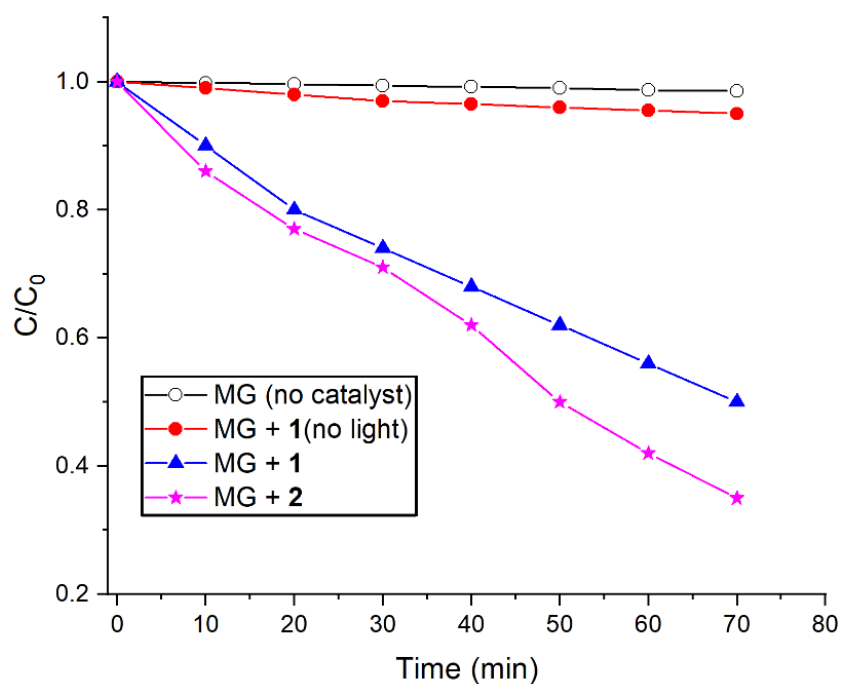

**Figure S7.** UV-vis spectroscopic observation of the photocatalytic degradation of MG dye in aqueous solution under visible light irradiation by the photocatalyst **1** and **2**.

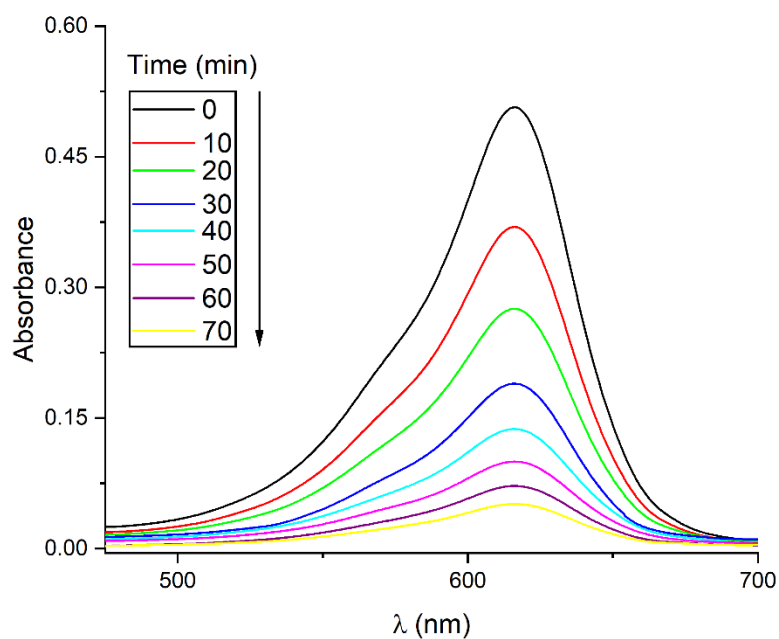

**Figure S8.** Absorption spectral change of MG dye for the photocatalytic degradation by photocatalyst generated from **2** and  $\text{H}_3\text{PO}_4$  in aqueous solution under visible light irradiation.

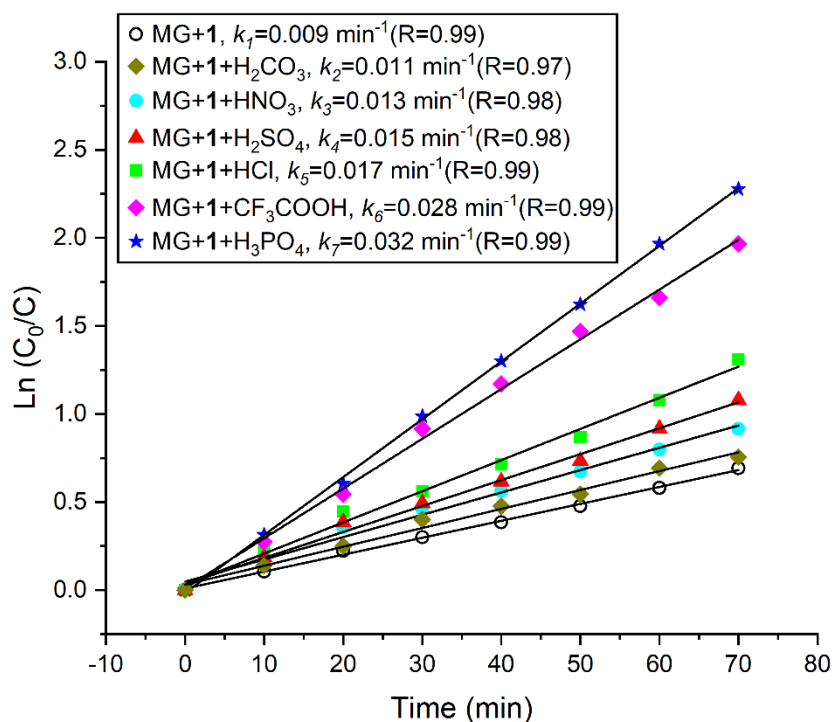

**Figure S9.** Kinetics for the photocatalytic degradation of MG under visible light irradiation by photocatalyst generated from **1** and various acids.

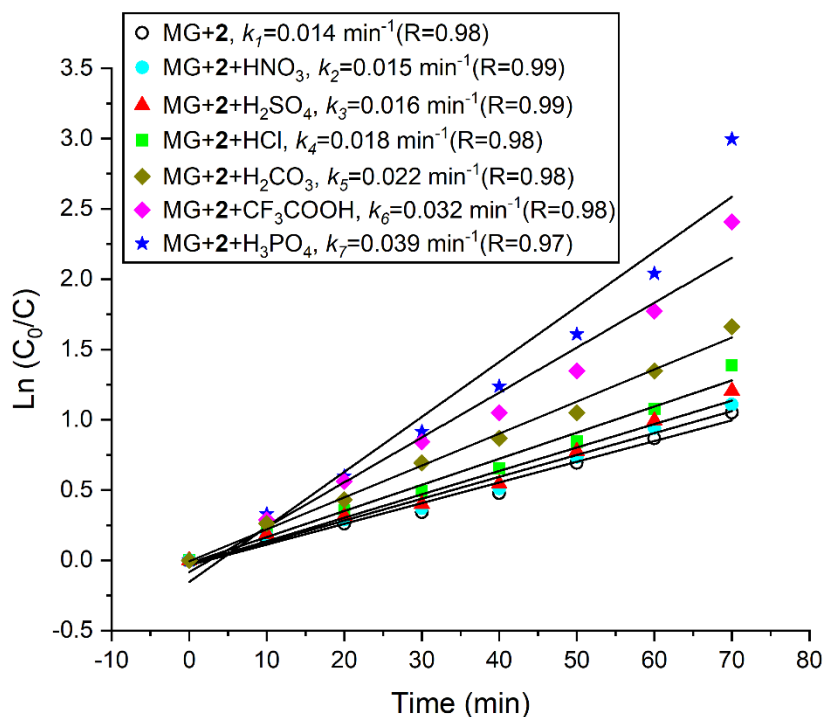

**Figure S10.** Kinetics for the photocatalytic degradation of MG under visible light irradiation by photocatalyst generated from **2** and various acids.

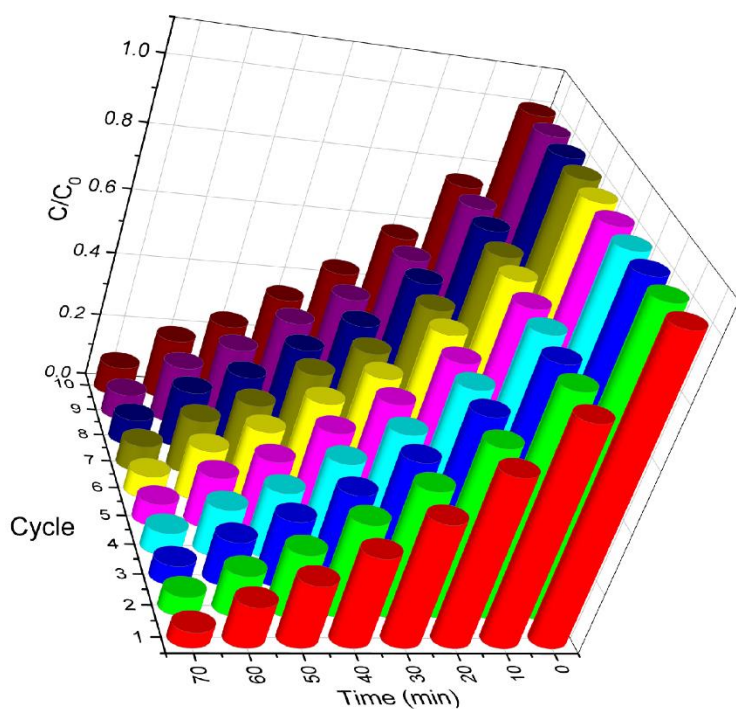

**Figure S11.** Recyclability of the photocatalyst generated from **2** and  $H_3PO_4$  towards the degradation of MG dye. Up to 10 cycle.

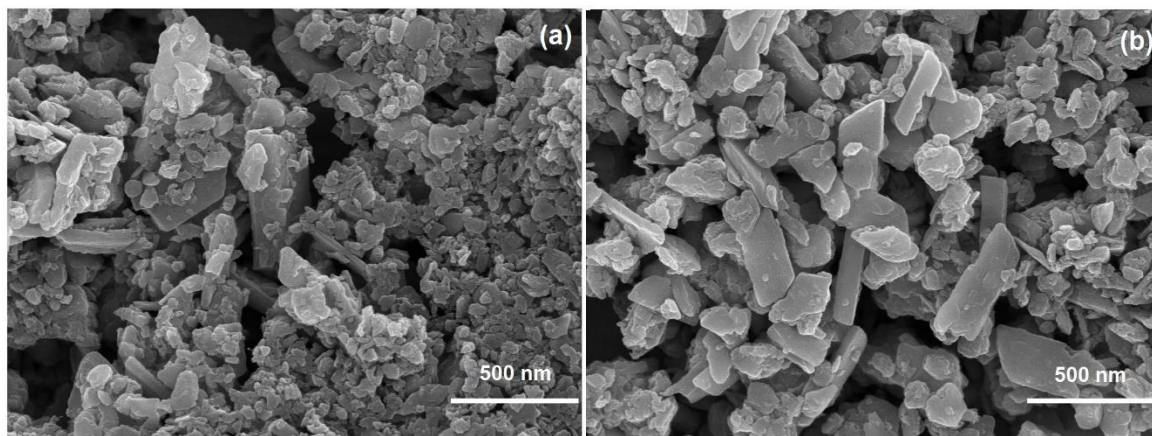

**Figure S12.** FE-SEM images of photocatalyst generated from **2** and  $H_3PO_4$  (after and before the degradation of MG dye).



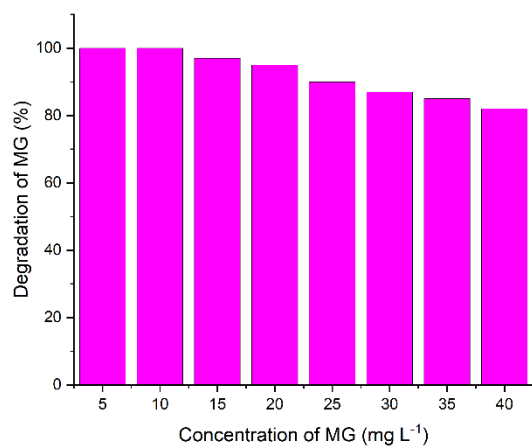

**Figure S13.** Effect of initial concentration of MG on the degradation by the photocatalyst (5 mg) generated from **2** and H<sub>3</sub>PO<sub>4</sub>.

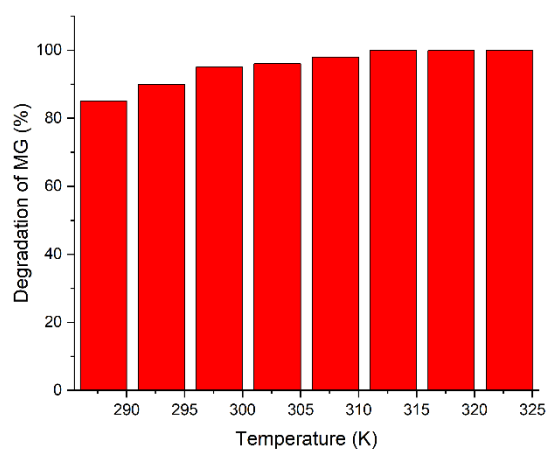

**Figure S14.** Effect of temperature on the MG degradation by the photocatalyst generated from **2** and H<sub>3</sub>PO<sub>4</sub>.

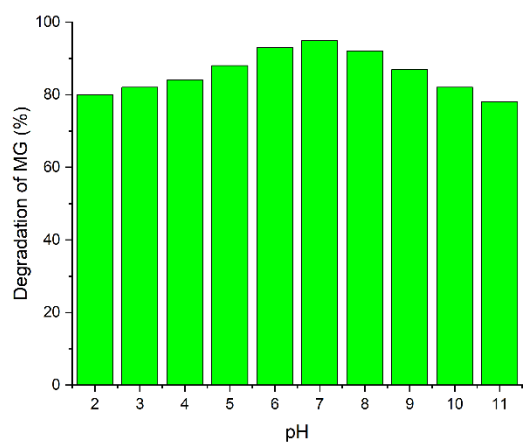

**Figure S15.** Effect of pH of the solution on the MG degradation by the photocatalyst generated from **2** and H<sub>3</sub>PO<sub>4</sub>.

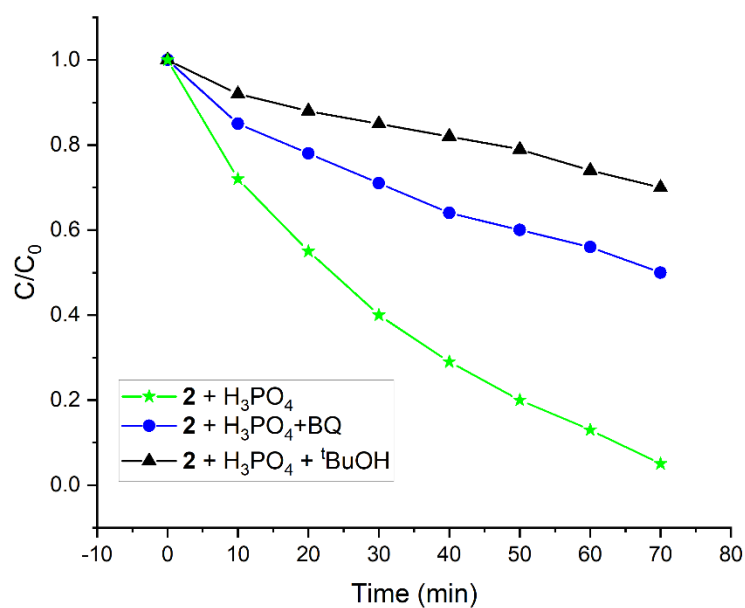

**Figure S16.** Photocatalytic degradation of MG dye in aqueous solution by the photocatalyst generated from **2** and H<sub>3</sub>PO<sub>4</sub> with the addition of different scavengers under visible light irradiation ([BQ]<sub>0</sub> = [tBuOH]<sub>0</sub> = 1 mM, pH 7, temperature 298 K).

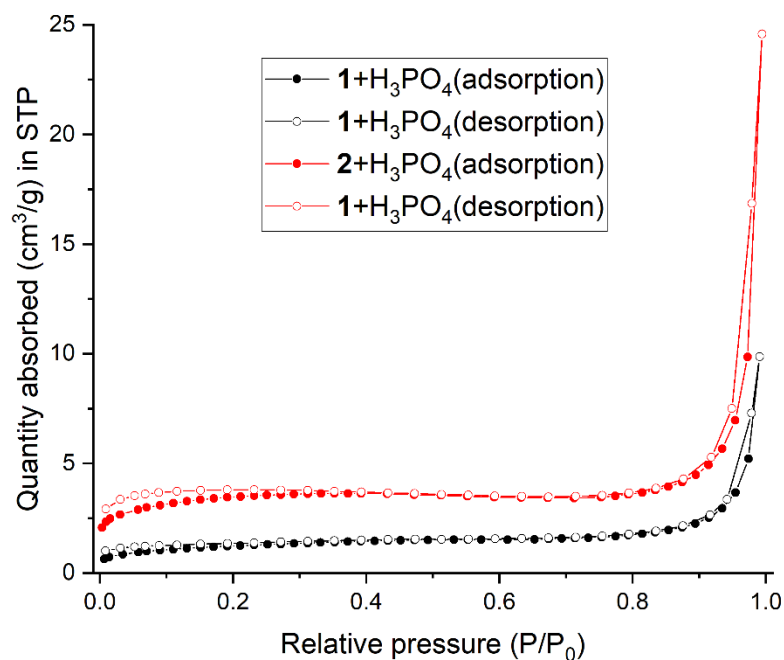

**Figure S17.** N<sub>2</sub> adsorption-desorption isotherms at 77 K for the photocatalysts derived from **1** and **2** with H<sub>3</sub>PO<sub>4</sub>.

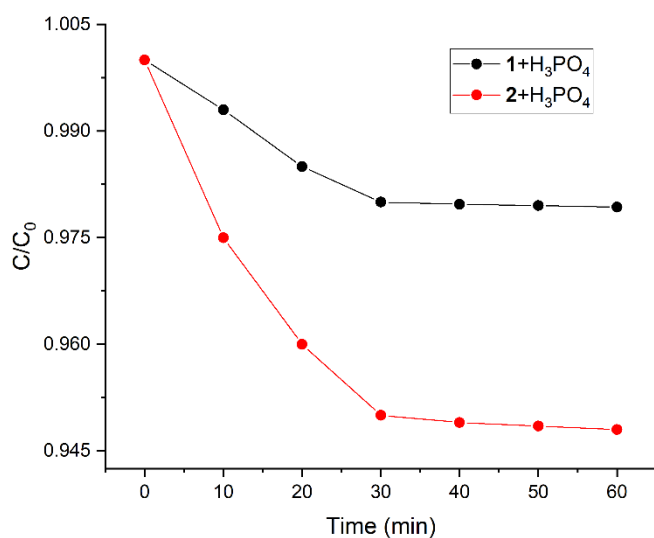

**Figure S18.** Adsorption of MG dye for the photocatalysts derived from **1** and **2** with H<sub>3</sub>PO<sub>4</sub>.

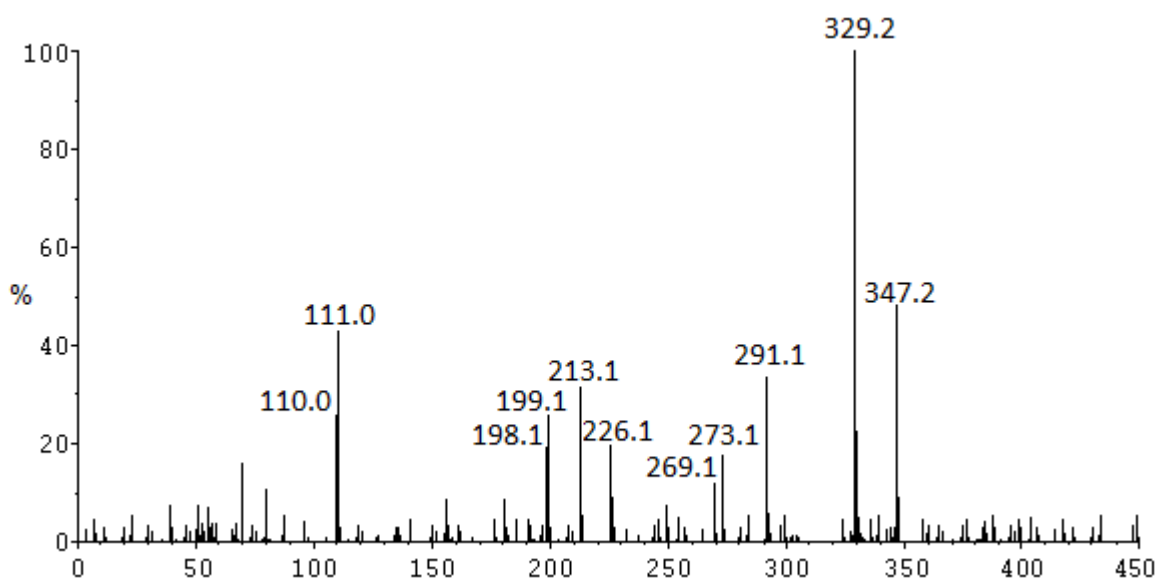

**Figure S19.** ESI-MS spectrum (positive ion mode) of the reaction mixture of MG with the photocatalyst generated from **2** and H<sub>3</sub>PO<sub>4</sub> after 30 min of visible light irradiation.
